# Supplementary material for: Microbial synthesis of hollow porous Prussian blue@yeast microspheres and their synergistic enhancement of organic pollutant removal performance
Source: Royal Society of Chemistry journal article supplement (doi:10.1039/c9ra02918d), 2019-01-01
Supplement: c9ra02918d1.pdf [file c9ra02918d1.pdf]

**Electronic Supplementary Information**

**Microbial Synthesis of Hollow Porous Prussian blue@yeast**

**Microspheres and their synergistic enhancement of organic pollutant**

**removal performance**

Si Chen <sup>a, b</sup>, Bo Bai <sup>\*, b, c, d</sup>, Xiaohui Xu <sup>a, b</sup>, Na Hu <sup>c, d</sup>, Honglun Wang <sup>c, d</sup>, Yourui Suo <sup>c, d</sup>

(<sup>a</sup> Key Laboratory of Subsurface Hydrology and Ecological Effects in Arid Region of the Ministry of Education, Chang'an University, No. 126 Yanta Road, Xi'an 710054, Shaanxi, China,

<sup>b</sup> College of Environmental Science and Engineering, Chang'an University, Xi'an, 710054, P.R. China;

<sup>c</sup> Key Laboratory of Tibetan Medicine Research, Northwest Institute of Plateau Biology, Chinese Academy of Sciences, Xining, 810008, China;

<sup>d</sup> Qinghai Provincial Key Laboratory of Tibetan Medicine Research, Xining, 810001, P.R. China)

\* Corresponding author

Email address: baibochina@163.com

Tel: +86 29 82339052

Fax: +86 29 82339961

## Figures

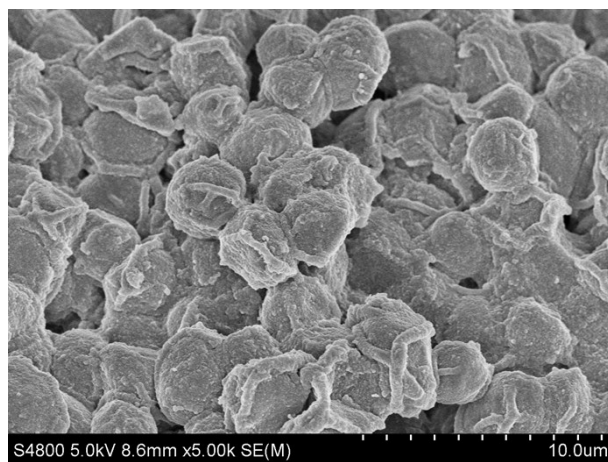

Fig.S1 FE-SEM image of PB@yeast synthesized by chemical precipitation.

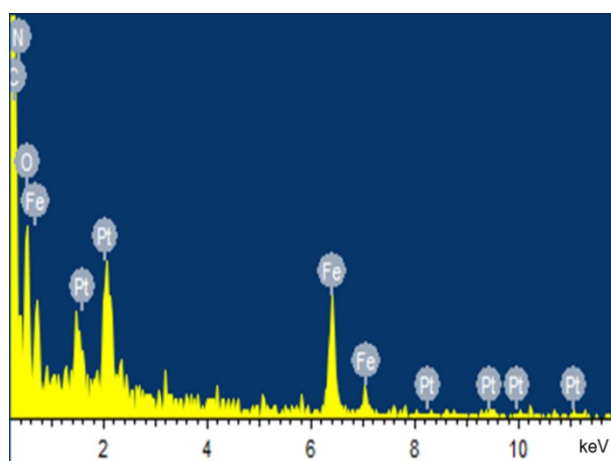

Fig. S2 EDS analysis of PB@yeast microsphere

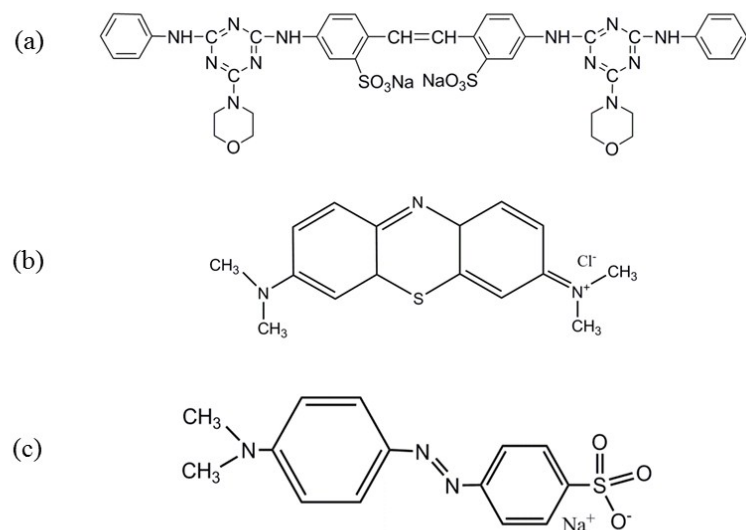

**Fig.S3** Basic molecular structures of (a) fluorescent brightener-CXT; (b) Methylene Blue(MB); (c) Methyl Orange (MO).

## Tables

Table S1. Comparison of the literature results about the photo-Fenton performance of PB-based materials in dyes containing wastewater treatment.

| <u>catalysts</u>                        | <u>Reaction conditions</u> |                                                      |                                                                     |                                              |            | <u>Major findings</u>         |                                   |                                         | <u>Ref.</u>          |
|-----------------------------------------|----------------------------|------------------------------------------------------|---------------------------------------------------------------------|----------------------------------------------|------------|-------------------------------|-----------------------------------|-----------------------------------------|----------------------|
|                                         | <u>dyes</u>                | <u>C<sub>0</sub></u><br>( <u>mg·L<sup>-1</sup></u> ) | <u>H<sub>2</sub>O<sub>2</sub></u><br>( <u>mmol·L<sup>-1</sup></u> ) | <u>Catal.</u><br>( <u>g L<sup>-1</sup></u> ) | <u>pH</u>  | <u>Time</u><br>( <u>min</u> ) | <u>Removal</u><br><u>rate (%)</u> | <u>k</u><br>( <u>min<sup>-1</sup></u> ) |                      |
| <u>PB NPs</u>                           | <u>RhB</u>                 | <u>7.5</u>                                           | <u>1.0</u>                                                          | <u>0.1</u>                                   | <u>5.0</u> | <u>120</u>                    | <u>80</u>                         | <u>0.0048</u>                           | <u>[1]</u>           |
| <u>PB/TiO<sub>2</sub></u>               | <u>RhB</u>                 | <u>12</u>                                            | <u>0.4*10<sup>3</sup></u>                                           | <u>1.0</u>                                   | <u>5.0</u> | <u>30</u>                     | <u>95</u>                         | <u>0.1020</u>                           | <u>[2]</u>           |
| <u>CNT/PB</u>                           | <u>MO</u>                  | <u>0.08</u>                                          | <u>1.0</u>                                                          | <u>-</u>                                     | <u>6.0</u> | <u>160</u>                    | <u>37</u>                         | <u>0.0024</u>                           | <u>[3]</u>           |
| <u>PB/γ-Al<sub>2</sub>O<sub>3</sub></u> | <u>OG</u>                  | <u>90</u>                                            | <u>9.0</u>                                                          | <u>6.5</u>                                   | <u>3.0</u> | <u>60</u>                     | <u>100</u>                        | <u>0.035</u>                            | <u>[4]</u>           |
| <u>PB@yeast</u>                         | <u>CXT</u>                 | <u>25</u>                                            | <u>0.2*10<sup>3</sup></u>                                           | <u>0.5</u>                                   | <u>5.0</u> | <u>40</u>                     | <u>99</u>                         | <u>0.1467</u>                           | <u>This<br/>work</u> |
